# Supplementary material
Source: PubMed Central journal article supplement (PMC3808140)
Supplement: mt2013164x1.pdf [file mt2013164x1.pdf]

# Supplementary Material

**Table S1.** Primers used to flank F and H for PCR cloning of the genes into VSV-FH genome.

| <b>Name</b>      | <b>Sequence</b>                                                        | <b>Size (nt)</b> |
|------------------|------------------------------------------------------------------------|------------------|
| <i>pCG-F FWD</i> | GACTCAGCAA GCGGCCGCCA CCGGGAATCC CAGAATCA                              | 38               |
| <i>RVS</i>       | TCGATCAGTG GCTCGAGGCA TGCCTACCGA TATTGTTCCG CCAGAGGGA                  | 49               |
| <i>pCG-H FWD</i> | GTCATCAGTG GCATGCTATG AAAAAAATA ACAGATATCA ACTTAGGGTG CAAGATCATC GATA  | 64               |
| <i>RVS</i>       | TCGATCAGTG GGCATGCTGA TATCTGTTAG TTTTTTTCAT AAACCACTG GACCCTACGT TTTTC | 65               |
